# Supplementary material
Source: HighWire-hosted journal article supplement (https://jnm.snmjournals.org/highwire/filestream/94912/field_highwire_adjunct_files/0/166280_Supplemental_Data.pdf)
Supplement: 166280_Supplemental_Data.pdf [file 166280_Supplemental_Data.pdf]

Supplemental Table 1: Comparison of response assessment criteria

| Criteria                                                              | Publication             | Modality     | Characteristics                                                                                                                                                                                                                                                                                                                         |
|-----------------------------------------------------------------------|-------------------------|--------------|-----------------------------------------------------------------------------------------------------------------------------------------------------------------------------------------------------------------------------------------------------------------------------------------------------------------------------------------|
| WHO<br>(World Health Organization)                                    | WHO,<br>1979            | Manual       | <ul style="list-style-type: none"> <li>Originally relied on physical measurements made in two dimensions using calipers</li> <li>Four response classifications (complete, partial, none, progressive) based on changes in tumor size</li> </ul>                                                                                         |
| EORTC<br>(European Organisation for Research and Treatment of Cancer) | Young et al,<br>1999    | PET          | <ul style="list-style-type: none"> <li>Among the first to utilize metabolic data from <sup>18</sup>F-FDG PET for response assessment</li> <li>Four response classifications (complete, partial, stable, progressive) based on changes in tumor size and metabolic activity</li> </ul>                                                   |
| RECIST<br>(Response Criteria in Solid Tumors)                         | Therasse et al,<br>2000 | CT           | <ul style="list-style-type: none"> <li>Relied on unidimensional measurements made using CT imaging</li> <li>Four response classifications (complete, partial, stable, progressive) based on changes in tumor size</li> </ul>                                                                                                            |
| PERCIST<br>(PET Response Criteria in Solid Tumors)                    | Wahl et al,<br>2009     | PET          | <ul style="list-style-type: none"> <li>Utilized metabolic data from <sup>18</sup>F-FDG PET, but with different thresholds from the EORTC criteria</li> <li>Four response classifications (complete, partial, stable, progressive) based on changes in metabolic activity</li> </ul>                                                     |
| IWC<br>(International Workshop Criteria)                              | Cheson et al,<br>1999   | CT           | <ul style="list-style-type: none"> <li>Dependent upon measurement made using CT imaging</li> <li>Five response classifications (complete, unconfirmed complete, partial, stable, progressive) based on changes in tumor size and clinical signs of disease</li> </ul>                                                                   |
| IWC+PET<br>(International Workshop Criteria + PET)                    | Juweid et al,<br>2005   | PET/CT       | <ul style="list-style-type: none"> <li>Incorporated functional PET data into the anatomical CT-based guidelines of IWC</li> <li>Five response classifications (complete, unconfirmed complete, partial, stable, progressive) based on changes in tumor size and metabolic activity</li> </ul>                                           |
| IHP<br>(International Harmonization Protocol)                         | Cheson et al,<br>2007   | PET/CT       | <ul style="list-style-type: none"> <li>Employs information from both PET and CT imaging</li> <li>Four response classifications (complete, partial, stable, progressive) based on changes in tumor size and metabolic activity</li> </ul>                                                                                                |
| Deauville                                                             | Meignan et al,<br>2009  | PET          | <ul style="list-style-type: none"> <li>Compares metabolism of tumor to that of background and reference organs on PET</li> <li>Five-point scale based on relative level of metabolic activity in tumor</li> </ul>                                                                                                                       |
| Lugano                                                                | Cheson et al,<br>2014   | PET/CT or CT | <ul style="list-style-type: none"> <li>Provides distinct criteria utilizing PET/CT and CT for use in different settings</li> <li>PET/CT criteria modifies the 5-point scale of the D5PS</li> <li>Four response classification (complete, partial, stable, progressive) based on changes in tumor size and metabolic activity</li> </ul> |

Supplemental Table 2: Tumor response classifications of WHO criteria (1979)

| <b>Classification</b>    | <b>Criteria</b>                                        |
|--------------------------|--------------------------------------------------------|
| Complete response (CR)   | Disappearance of tumor for over four weeks             |
| Partial response (PR)    | Shrinkage of tumor by at least 50% over four weeks     |
| No response (NR)         | Less than 50% reduction and 25% increase in tumor size |
| Progressive disease (PD) | Growth of tumor by at least 25%                        |

Supplemental Table 3: Tumor response classifications of EORTC criteria (1999)

| <b>Classification</b>               | <b>Criteria</b>                                                                                                                                       |
|-------------------------------------|-------------------------------------------------------------------------------------------------------------------------------------------------------|
| Complete metabolic response (CMR)   | Reduction in $^{18}\text{F}$ -FDG uptake in tumor volume to the level of background tissue                                                            |
| Partial metabolic response (PMR)    | Reduction of at least 15%-25% in $^{18}\text{F}$ -FDG uptake in tumor volume after one cycle of chemotherapy                                          |
| Stable metabolic disease (SMD)      | Less than 15% reduction and 25% increase in $^{18}\text{F}$ -FDG uptake in tumor volume; less than 20% increase in the longest dimension of the tumor |
| Progressive metabolic disease (PMD) | Increase of at least 25% in $^{18}\text{F}$ -FDG uptake in tumor volume; greater than 20% increase in the longest dimension of the tumor              |

Supplemental Table 4: Tumor response classifications of the IWC+PET criteria (2005)

| <b>Classification</b>               | <b>Criteria</b>                                                                                                                                                              |
|-------------------------------------|------------------------------------------------------------------------------------------------------------------------------------------------------------------------------|
| Complete response (CR)              | A CR by IWC with a completely negative PET scan                                                                                                                              |
| Unconfirmed complete response (CRu) | A CRu with a completely negative PET scan                                                                                                                                    |
| Partial response (PR)               | A CR, CRu, or PR by IWC with a positive PET finding at a previously involved site or a CR, CRu, PR, or SD by IWC with a positive PET finding at a previously uninvolved site |
| Stable disease (SD)                 | SD by IWC with a positive PET finding at a previously involved site                                                                                                          |
| Progressive disease (PD)            | PD by IWC with a positive PET finding corresponding to a CT abnormality or a PD by IWC with a CT abnormality larger than 1.5 cm                                              |
